# Supplementary material for: Three dominant synoptic atmospheric circulation patterns influencing severe winter haze in eastern China
Source: Copernicus journal article supplement (doi:10.5194/acp-22-16017-2022), 2022-12-21
Supplement: Supplementary file 1 [file acp-22-16017-2022-supplement.pdf]

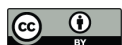

*Supplement of*

## **Three dominant synoptic atmospheric circulation patterns influencing severe winter haze in eastern China**

**Shiyue Zhang et al.**

*Correspondence to:* Gang Zeng (zenggang@nuist.edu.cn)

The copyright of individual parts of the supplement might differ from the article licence.

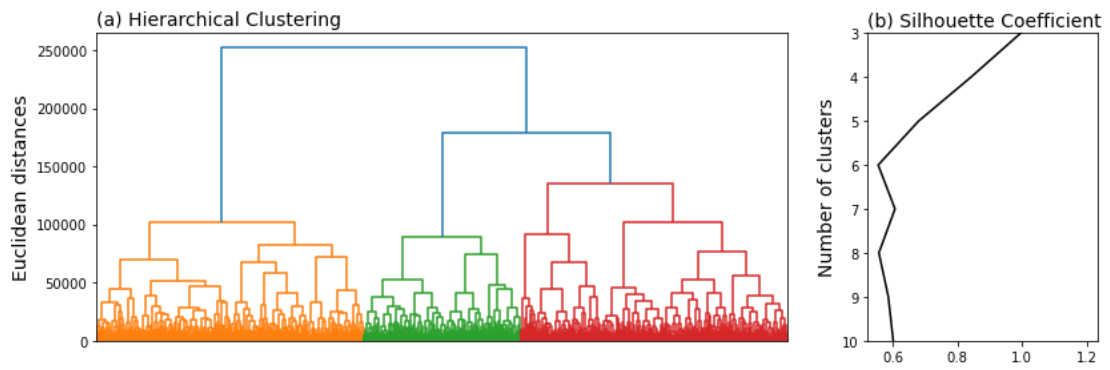

16

17 **Figure S1.** (a) Hierarchical clustering tree and (b) silhouette coefficient of GPH anomalies at 500-

18 hPa in NDJF.

19

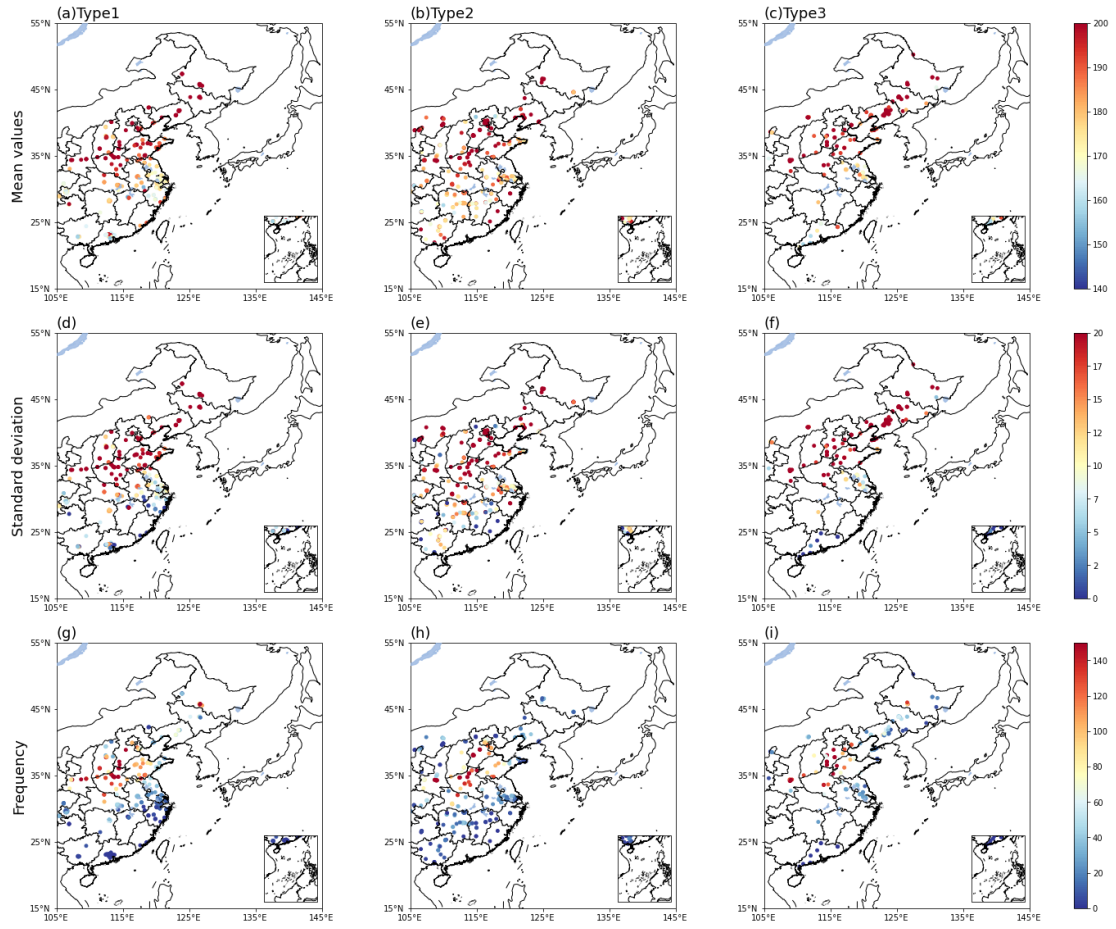

20

21 **Figure S2.** (a) Mean, (d) standard deviation of PM<sub>2.5</sub> concentration distribution and (g) frequency of  
 22 severe haze days in cluster samples of Type1. (b), (e), (h) and (c), (f), (j) are the same as (a), (d), (g),  
 23 but for Type2 and Type3, respectively.

24
